# Supplementary material
Source: Springer Nature journal article supplement (https://www.springermedizin.de/resource/supplementary/12876_2008_292_MOESM1_ESM.pdf/9439100)
Supplement: MOESM1 [file 9439100]

Total 675 cirrhotic patients admitted with ascites

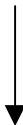

483 excluded

(455 patients had no AFI, 25 patients had more than 1 episode of SBP and 8 patients had prior antibiotic therapy in last 30 days)

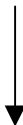

187 patients included in the study

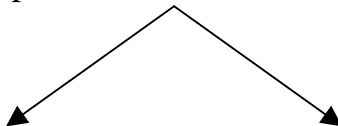

SBP (n=44)  
23.5%

CNNA (n=143)  
76.4%
